# Supplementary material
Source: PubMed Central journal article supplement (PMC3538028)

Supplementary Figures for Wu et al.

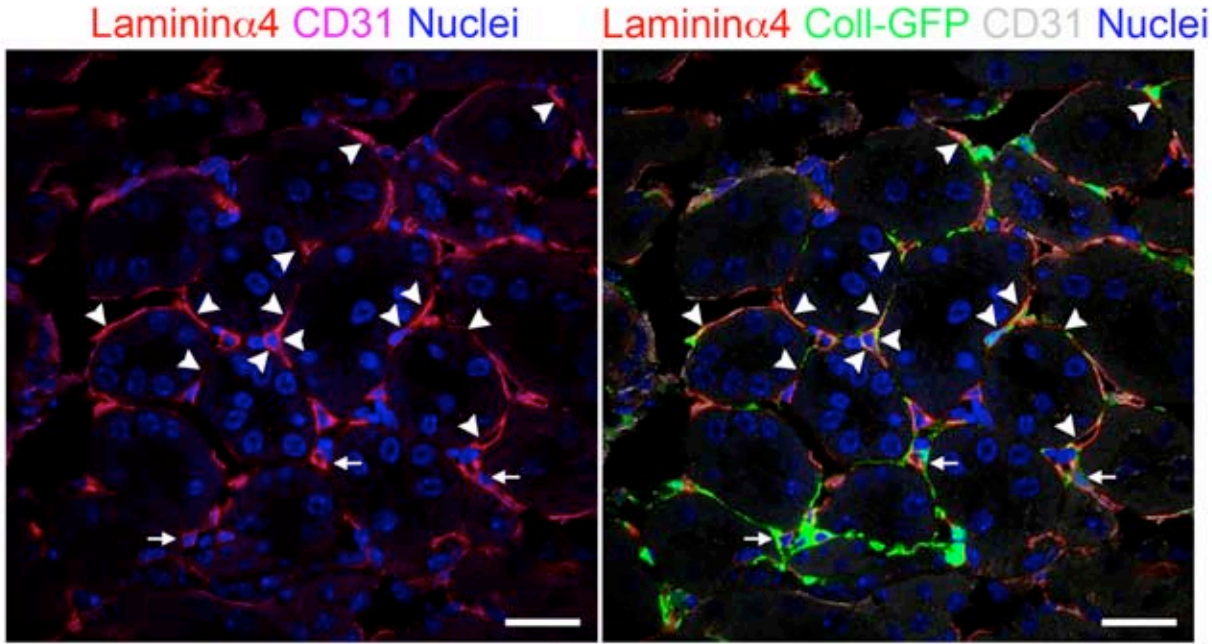

Supplementary Figure S1.

Supplement: mmc1.pdf [file mmc1.pdf]

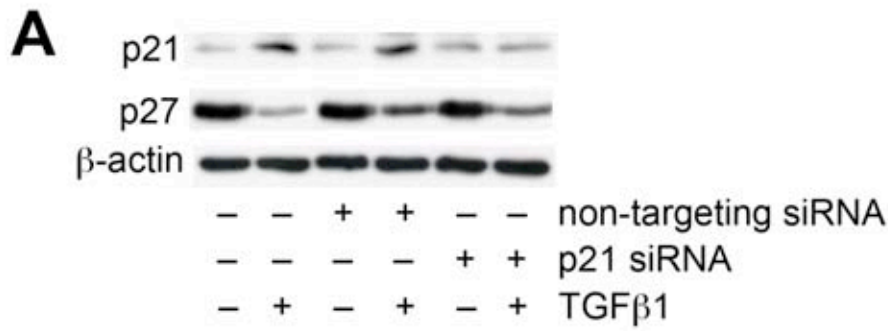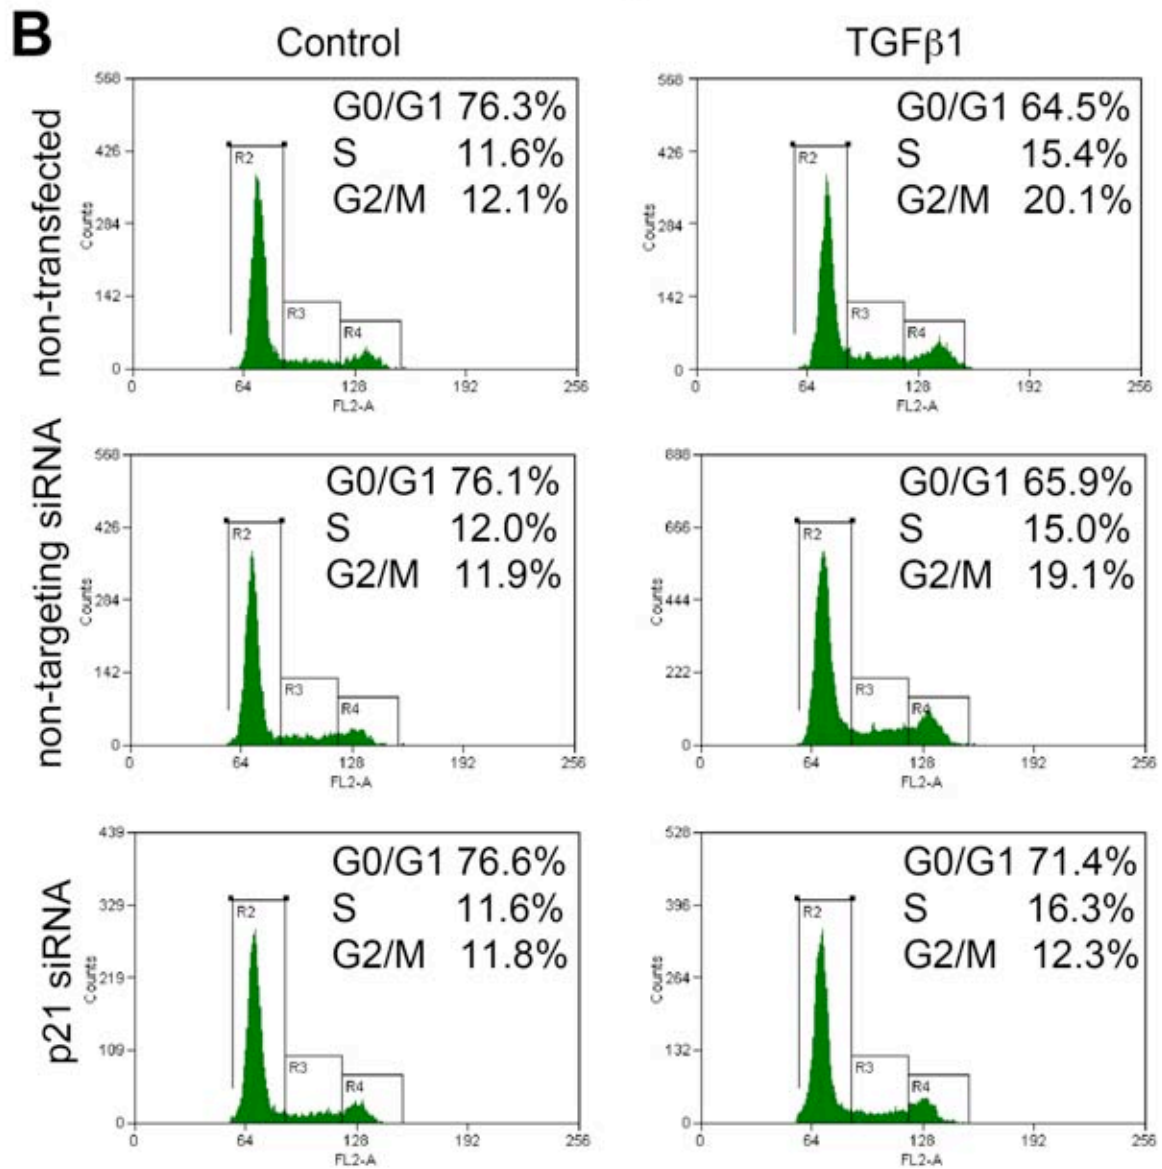

Supplementary Figure S10.

Supplement: mmc10.pdf [file mmc10.pdf]

**A** Normal kidney

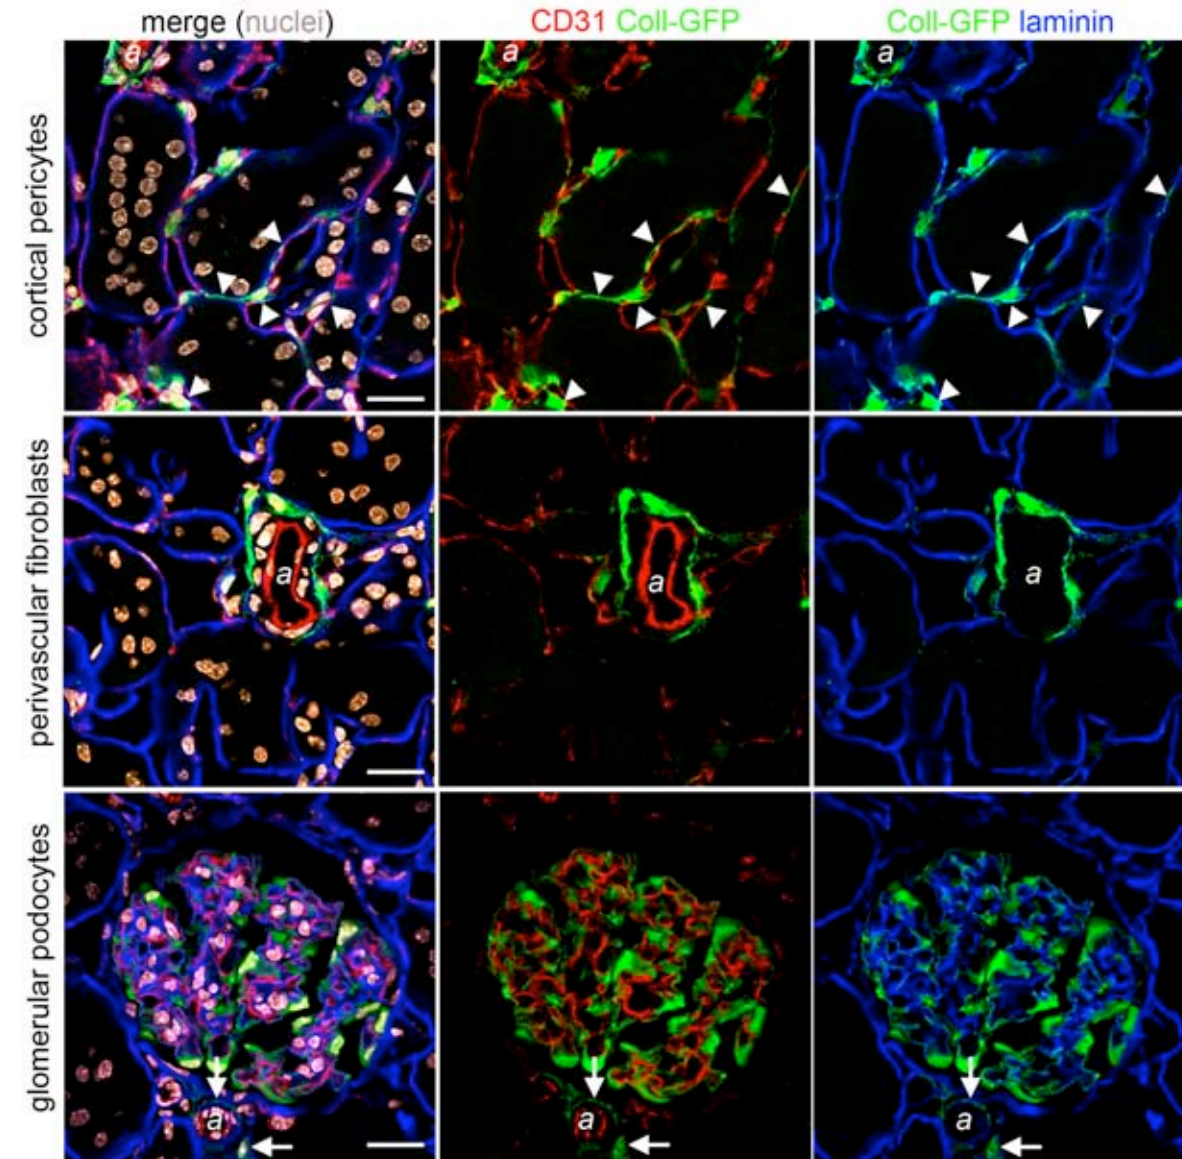

**B** Day 2 UUO kidney

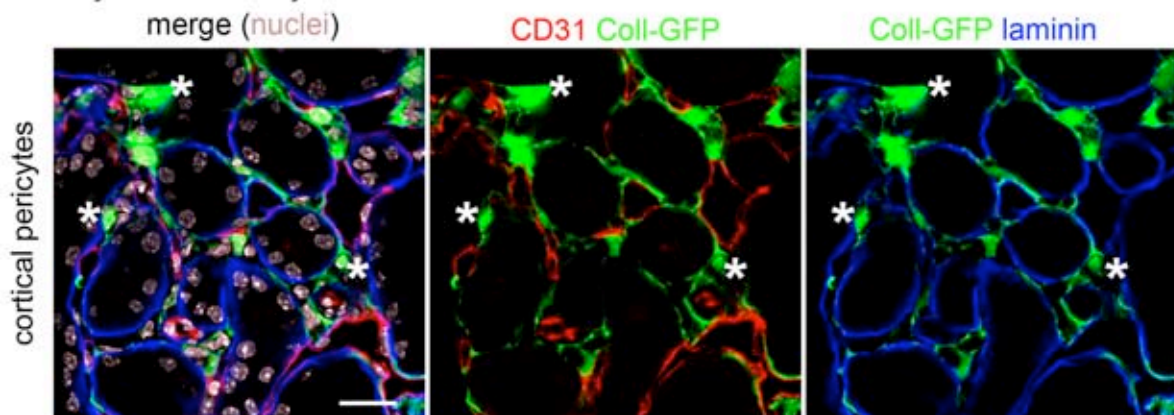

Supplementary Figure S2.

Supplement: mmc2.pdf [file mmc2.pdf]

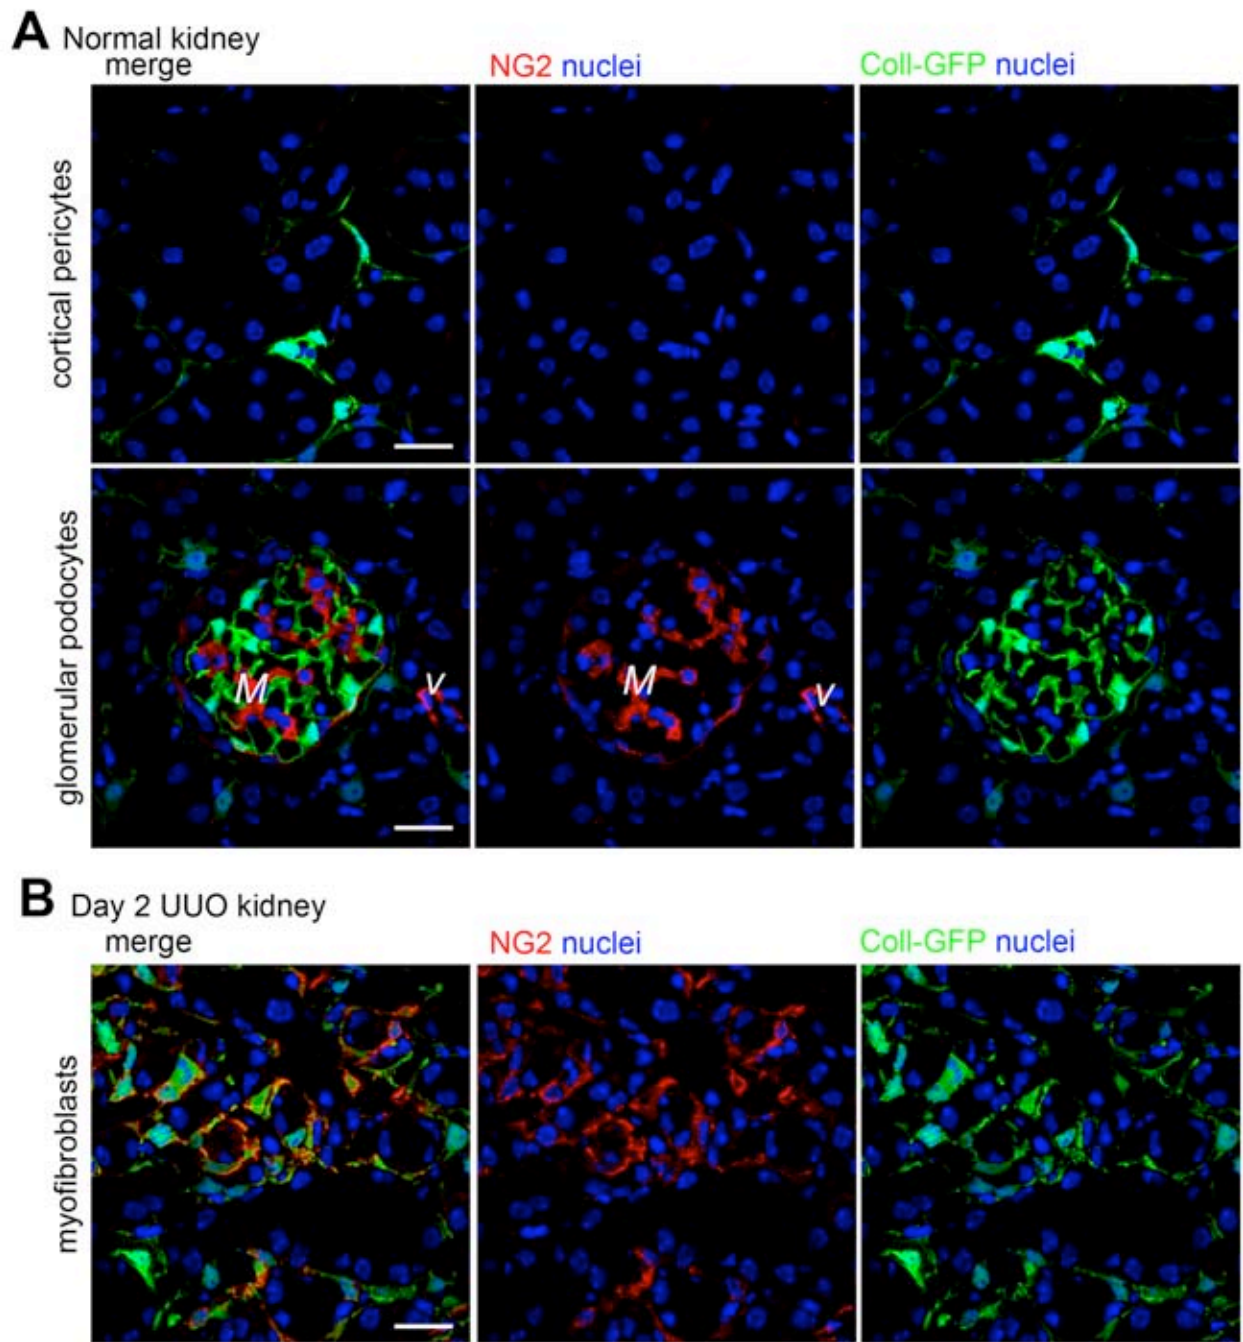

Supplementary Figure S3.

Supplement: mmc3.pdf [file mmc3.pdf]

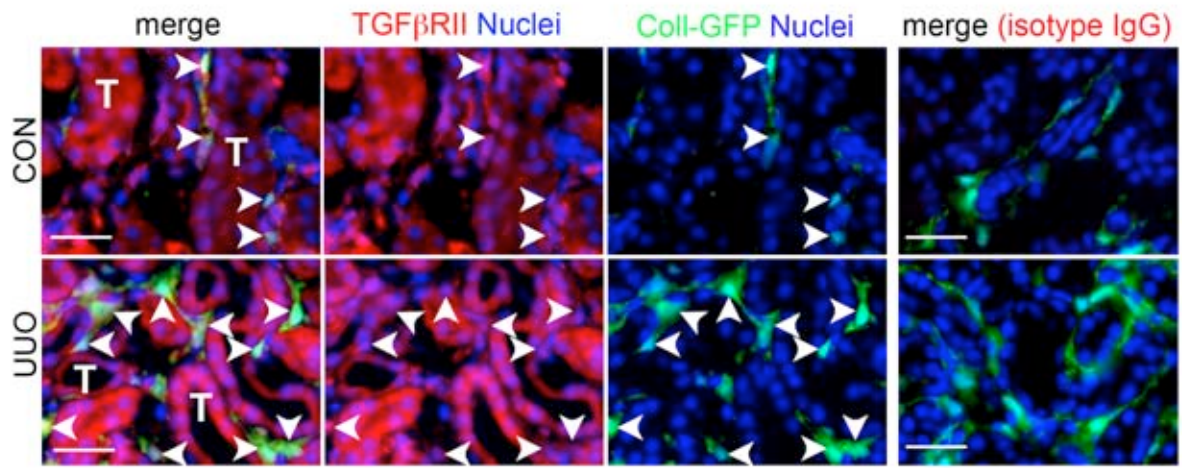

Supplementary Figure S4.

Supplement: mmc4.pdf [file mmc4.pdf]

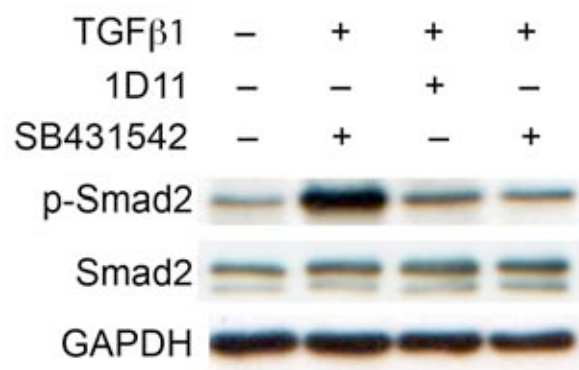

**Supplementary Figure S5.**

Supplement: mmc5.pdf [file mmc5.pdf]

Coll-GFP+;PDGFR $\alpha$ + kidney cells

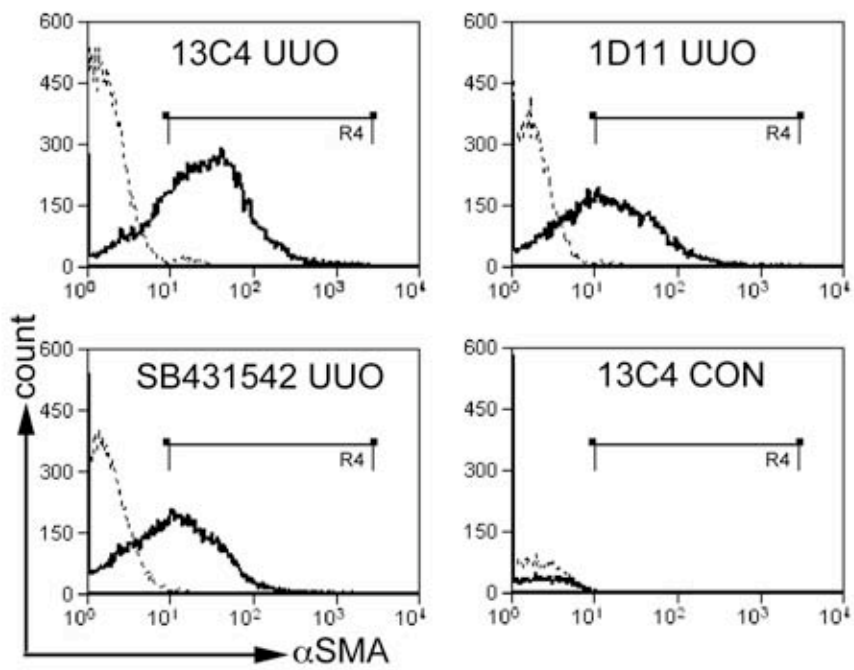

Supplementary Figure S6.

Supplement: mmc6.pdf [file mmc6.pdf]

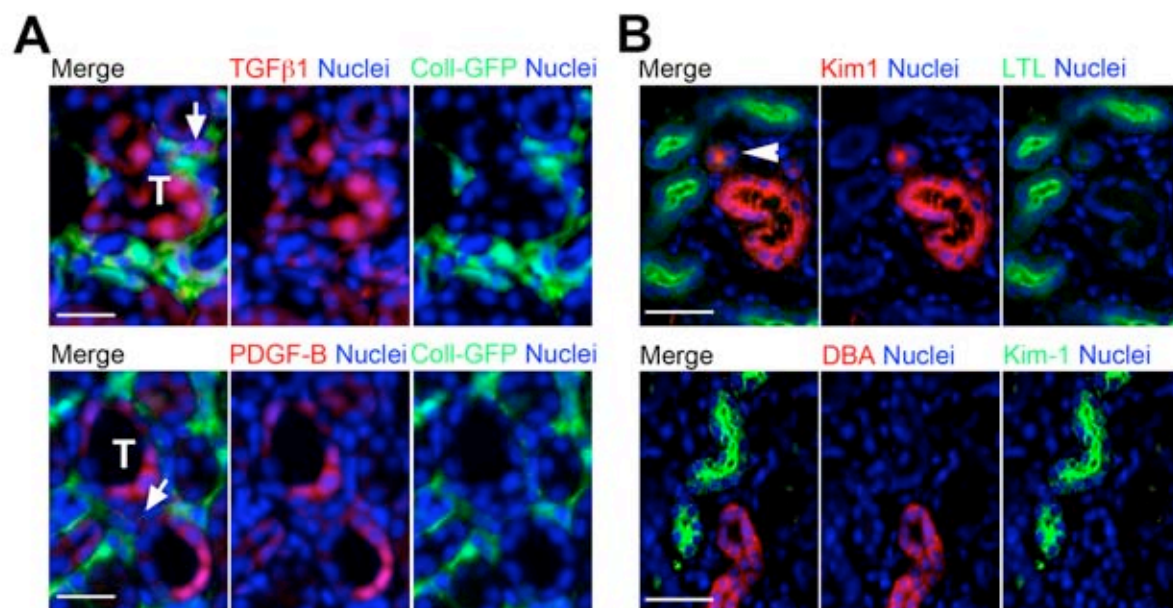

Supplementary Figure S7.

Supplement: mmc7.pdf [file mmc7.pdf]

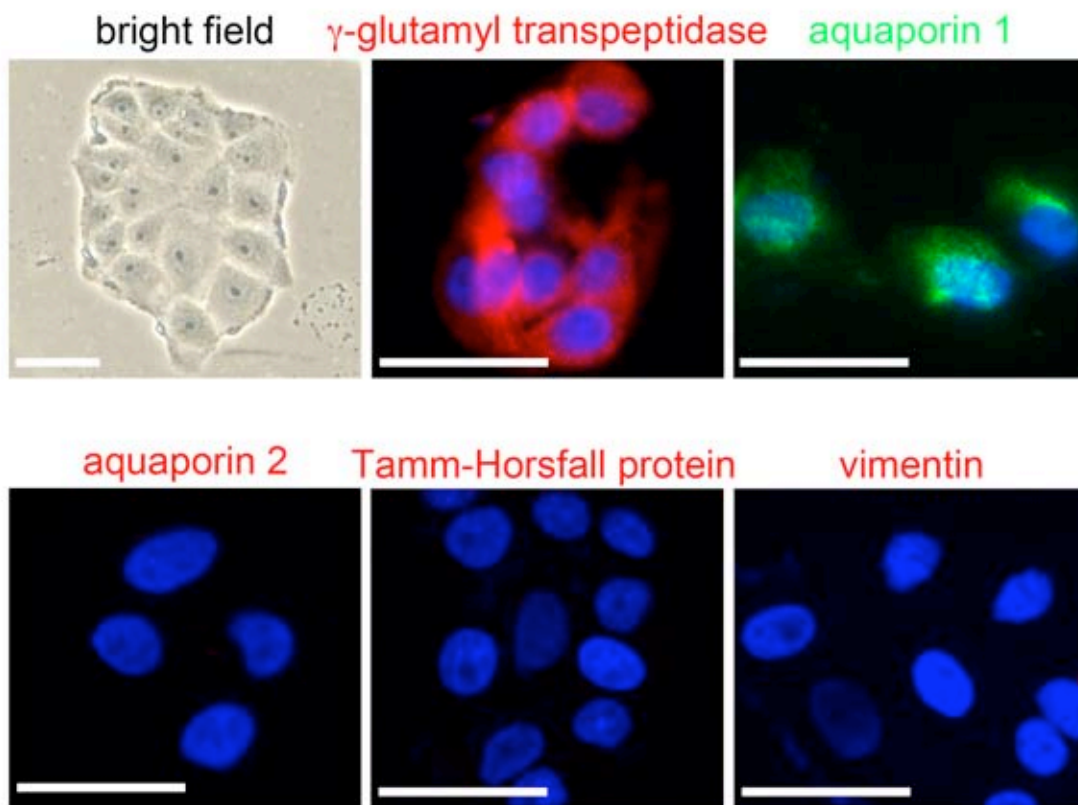

**Supplementary Figure S8.**

Supplement: mmc8.pdf [file mmc8.pdf]

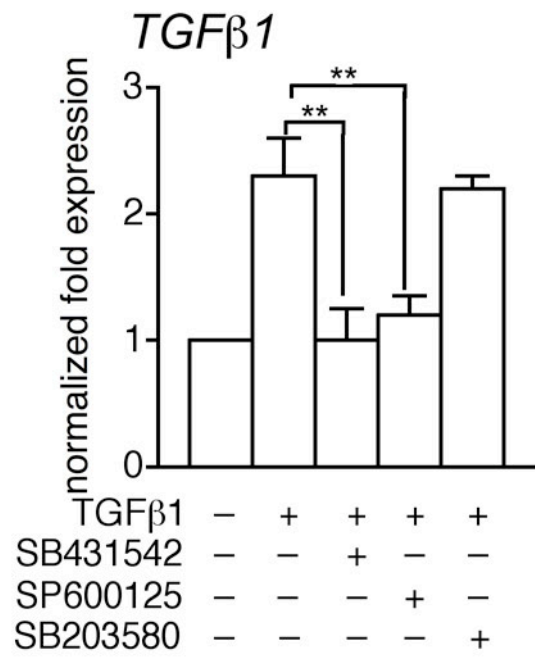

**Supplementary Figure S9.**

Supplement: mmc9.pdf [file mmc9.pdf]
